# Supplementary material for: Performance enhancement of air-stable thieno[2,3-b]thiophene organic field-effect transistors via alkyl chain engineering
Source: Royal Society of Chemistry journal article supplement (doi:10.1039/d5tc01512j), 2025-01-01
Supplement: d5tc01512j1.pdf [file d5tc01512j1.pdf]

## Supporting Information

### Performance Enhancement of Air-Stable Thieno[2,3-*b*]Thiophene Organic Field-Effect Transistors via Alkyl Chain Engineering

Seongjin Oh<sup>a†</sup>, Hyowon Kang<sup>b†</sup>, Choongik Kim<sup>a\*</sup>, SungYong Seo<sup>b,c\*</sup>

<sup>a</sup> Department of Chemical and Biomolecular Engineering, Sogang University, 35 Baekbom-ro, Mapo-gu, Seoul 04107, Republic of Korea

<sup>b</sup> Department of Smart Green Technology Engineering, Pukyong National University, Busan, 48513, Korea

<sup>c</sup> Department of Chemistry, Pukyong National University, Busan 48513, Korea

\*E-mail : choongik@sogang.ac.kr; syseo@pknu.ac.kr;

† These authors contributed equally to this work

Keywords: organic field effect transistors; organic semiconductor; solution shearing; air stability; alkyl chain engineering; thieno[2,3-*b*]thiophene

## 2. Experimental details

### 2.1 Materials and methods

Thermogravimetric analysis (TGA) was performed using a platinum pan in a nitrogen atmosphere (TA Instrument, Q50-1555), heating the samples from 30 °C to 800 °C at 10 °C/min. Differential scanning calorimetry (DSC) was conducted between 20 °C and 250 °C with a scan rate of 10 °C/min (TA instrument, Q20-2487). UV-visible spectroscopy (JASCO V-750) was conducted on chloroform solutions and thin films over a wavelength range of 200 – 900 nm. For solution-state measurements, samples were dissolved in chloroform at a concentration of  $5.0 \times 10^{-2}$  mM. For thin-film measurements, glass substrates were sequentially cleaned by ultrasonication in acetone and isopropanol for 10 min each, followed by oxygen plasma treatment for 5 min (Harrick plasma, PDC-32G, 18W). Thin films were fabricated by drop-casting a 4 mg/mL chloroform solution onto the pretreated substrates. Cyclic voltammetry (CV) measurements were carried out in a dichloromethane solution containing tetrabutylammonium perchlorate as the supporting electrolyte, using a three-electrode cell setup with a platinum working electrode, a platinum spiral wire counter electrode, and an Ag/AgCl reference electrode (Autolab, PGSTAT204). All electrochemical potentials were referenced against the  $\text{Fc}^+/\text{Fc}$  internal standard. Density functional theory (DFT) calculations were performed utilizing the B3LYP (Becke's 3 parameters employing the Lee-Yang-Parr) functional method along with the 6-31G(d) basis set. These calculations were executed using the Gaussian 09W software.

### 2.2 Synthesis

#### 2.2.1. Synthesis of 2,5-diiodothieno[2,3-*b*]thiophene (1a)

A mixture of thieno[2,3-*b*]thiophene (204.1 mg, 1.46 mmol), *n*-iodosuccinimide (852 mg, 3.78 mmol), and acetic acid (5 mL) in  $\text{CHCl}_3$  (10 mL) was stirred in an ice bath until the

temperature reached 25 °C.<sup>1,2</sup> The mixture was extracted with CH<sub>2</sub>Cl<sub>2</sub> and the combined organic phase was washed with water and brine. The organic phase was dried over anhydrous MgSO<sub>4</sub>. The solvent was removed in vacuo and the residue was purified by column chromatography on silica gel using hexane as the mobile phase to afford compound **1a** as a white solid (495.2 mg, 86 %). <sup>1</sup>H NMR (400 MHz, CDCl<sub>3</sub>) δ 7.33 (s, 2H). <sup>13</sup>C NMR (101 MHz, CDCl<sub>3</sub>) δ 143.2, 142.5, 134.6, 76.7, 17.4.

### 2.2.2. Synthesis of 2,5-diiodo-3,4-dimethylthieno[2,3-*b*]thiophene (**1b**)

A mixture of 3,4-dimethylthieno[2,3-*b*]thiophene (215.4 mg, 1.28 mmol), *n*-iodosuccinimide (748.7 mg, 3.33 mmol), and acetic acid (5 mL) in CHCl<sub>3</sub> (10 mL) was stirred in an ice bath until the temperature reached 25 °C.<sup>1,2</sup> The mixture was extracted with CH<sub>2</sub>Cl<sub>2</sub>, and the combined organic phase was washed with water and brine. The organic phase was dried over anhydrous MgSO<sub>4</sub>. The solvent was removed in vacuo, and the residue was purified by column chromatography on silica gel using hexane as the mobile phase to afford compound **1b** as a white solid (535 mg, 99 %). <sup>1</sup>H NMR (400 MHz, CDCl<sub>3</sub>) δ 2.41 (s, 6H). <sup>13</sup>C NMR (101 MHz, CDCl<sub>3</sub>) δ 148.5, 143.6, 128.4, 75.2. HRMS-APCI(*m/z*): [M<sup>+</sup>] calcd. for C<sub>8</sub>H<sub>6</sub>I<sub>2</sub>S<sub>2</sub>, 419.8000; found, 419.8002.

### 2.2.3. Synthesis of 2,5-bis((trimethylsilyl)ethynyl)thieno[2,3-*b*]thiophene (**1c**)

A mixture of compound **1a** (200.5 mg, 0.51 mmol), trimethylsilylacetylene (0.29 mL, 2.05 mmol), CuI (9.7 mg, 10 mol%) and Pd(PPh<sub>3</sub>)<sub>4</sub> (29.6 mg, 5 mol%) in anhydrous THF (5 mL) and isopropylamine (8 mL) was stirred at 55 °C for 20 h under N<sub>2</sub> atmosphere.<sup>3</sup> The mixture was extracted with Et<sub>2</sub>O, and the combined organic phase was washed with water and brine. The organic phase was dried over anhydrous MgSO<sub>4</sub>. The solvent was removed in vacuo, and the residue was purified by column chromatography on silica gel using hexane as

the mobile phase to afford compound **1c** as a brown solid (150 mg, 88 %). <sup>1</sup>H NMR (400 MHz, CDCl<sub>3</sub>) δ 7.28 (s, 2H), 0.26 (s, 18H).

#### 2.2.4. Synthesis of ((3,4-dimethylthieno[2,3-*b*]thiophene-2,5-diyl)bis(ethyne-2,1-diyl))bis(trimethylsilane) (**1d**)

A mixture of compound **1b** (201.9 mg, 0.48 mmol), trimethylsilylacetylene (0.28 mL, 1.92 mmol), CuI (9.2 mg, 10 mol%) and Pd(PPh<sub>3</sub>)<sub>4</sub> (27.8 mg, 5 mol%) in anhydrous THF (5 mL) and isopropylamine (8 mL) was stirred at 55 °C for 20 h under N<sub>2</sub> atmosphere.<sup>3</sup> The mixture was extracted with Et<sub>2</sub>O, and the combined organic phase was washed with water and brine. The organic phase was dried over anhydrous MgSO<sub>4</sub>. The solvent was removed in vacuo, and the residue was purified by column chromatography on silica gel using hexane as the mobile phase to afford compound **1d** as a brown solid (149 mg, 86 %). <sup>1</sup>H NMR (400 MHz, CDCl<sub>3</sub>) δ 2.51 (s, 6H), 0.27 (s, 18H).

#### 2.2.5. Synthesis of 2,5-bis((5-octylthiophen-2-yl)ethynyl)thieno[2,3-*b*]thiophene (**1**)

A mixture of compound **1c** (104.3 mg, 0.31 mmol), K<sub>2</sub>CO<sub>3</sub> (4.3 mg, 0.031 mmol) in MeOH (10 mL) was stirred at room temperature for 1.5 h. The mixture was extracted with CH<sub>2</sub>Cl<sub>2</sub> and the combined organic phase was washed with water and brine. The organic phase was dried over anhydrous MgSO<sub>4</sub>. Without extra purification, the solvent was removed in vacuo. The resulting brown solid, 2-iodo-5-octylthiophene (0.25 mL, 0.94 mmol), Pd(PPh<sub>3</sub>)<sub>4</sub> (18.1 mg, 5 mol%), CuI (5.97 mg, 10 mol%) in triethylamine (10 mL) were stirred at 55 °C for 20 h under N<sub>2</sub> atmosphere.<sup>4, 5</sup> The mixture was extracted with Et<sub>2</sub>O and the combined organic phase was washed with water and brine. The organic phase was dried over anhydrous MgSO<sub>4</sub>. The solvent was removed in vacuo and the residue was purified by column chromatography on silica gel using hexane as the mobile phase to afford compound **1** as a

yellowish solid (78.1 mg, 43 %). <sup>1</sup>H NMR (400 MHz, CDCl<sub>3</sub>) δ 7.31 (s, 2H), 7.12 (d, J = 3.7 Hz, 2H), 6.69 (d, J = 3.7 Hz, 2H), 2.82-2.78 (m, 4H), 1.71-1.64 (m, 4H), 1.41-1.25 (m, 20H), 0.88 (t, 6H). <sup>13</sup>C NMR (101 MHz, CDCl<sub>3</sub>) δ 149.4, 144.7, 139.2, 132.7, 126.4, 124.5, 124.3, 119.7, 88.2, 85.6, 32.0, 31.6, 30.4, 29.4, 29.3, 29.2, 22.8, 14.2. HRMS-APCI(m/z): [M + H<sup>+</sup>] calcd. for C<sub>34</sub>H<sub>41</sub>S<sub>4</sub>, 577.2086; found, 577.2088.

#### 2.2.6. Synthesis of 2,5-bis((5-(2-ethylhexyl)thiophen-2-yl)ethynyl)thieno[2,3-*b*]thiophene (2)

A mixture of compound **1c** (52.2 mg, 0.16 mmol), K<sub>2</sub>CO<sub>3</sub> (2.2 mg, 0.016 mmol) in MeOH (10 mL) was stirred at room temperature for 1.5 h. The mixture was extracted with CH<sub>2</sub>Cl<sub>2</sub> and the combined organic phase was washed with water and brine. The organic phase was dried over anhydrous MgSO<sub>4</sub>. Without extra purification, the solvent was removed in vacuo. The resulting brown solid, 2-(2-ethylhexyl)-5-iodothiophene (0.13 mL, 0.47 mmol), Pd(PPh<sub>3</sub>)<sub>4</sub> (9 mg, 5 mol%), CuI (2.99 mg, 10 mol%) in triethylamine (10 mL) were stirred at 55 °C for 20 h under N<sub>2</sub> atmosphere.<sup>4, 5</sup> The mixture was extracted with Et<sub>2</sub>O and the combined organic phase was washed with water and brine. The organic phase was dried over anhydrous MgSO<sub>4</sub>. The solvent was removed in vacuo and the residue was purified by column chromatography on silica gel using hexane as the mobile phase to afford compound **2** as a yellowish solid (33.9 mg, 37 %). <sup>1</sup>H NMR (400 MHz, CDCl<sub>3</sub>) δ 7.31 (s, 2H), 7.13 (d, J = 3.7 Hz, 2H), 6.67 (d, J = 3.7 Hz, 2H), 2.75 (d, J = 6.9 Hz, 4H), 1.65-1.55 (m, 2H), 1.39-1.25 (m, 16H), 0.93-0.86 (m, 12H). <sup>13</sup>C NMR (101 MHz, CDCl<sub>3</sub>) δ 148.1, 144.7, 139.2, 132.7, 126.4, 125.5, 124.3, 119.9, 88.2, 85.7, 41.6, 34.3, 32.4, 28.9, 25.6, 23.1, 14.2, 10.9. HRMS-APCI(m/z): [M + H<sup>+</sup>] calcd. for C<sub>34</sub>H<sub>41</sub>S<sub>4</sub>, 577.2086; found, 577.2088.

### 2.2.7. Synthesis of 3,4-dimethyl-2,5-bis((5-octylthiophen-2-yl)ethynyl)thieno[2,3-*b*]thiophene (3)

A mixture of compound **1d** (41.5 mg, 0.12 mmol), K<sub>2</sub>CO<sub>3</sub> (1.6 mg, 0.012 mmol) in MeOH (10 mL) was stirred at room temperature for 1.5 h. The mixture was extracted with CH<sub>2</sub>Cl<sub>2</sub> and the combined organic phase was washed with water and brine. The organic phase was dried over anhydrous MgSO<sub>4</sub>. Without extra purification, the solvent was removed in vacuo. The resulting brown solid, 2-iodo-5-octylthiophene (0.09 mL, 0.35 mmol), Pd(PPh<sub>3</sub>)<sub>4</sub> (6.6 mg, 5 mol%), CuI (2.2 mg, 10 mol%) in triethylamine (10 mL) were stirred at 55 °C for 20 h under N<sub>2</sub> atmosphere.<sup>4, 5</sup> The mixture was extracted with Et<sub>2</sub>O and the combined organic phase was washed with water and brine. The organic phase was dried over anhydrous MgSO<sub>4</sub>. The solvent was removed in vacuo and the residue was purified by column chromatography on silica gel using hexane as the mobile phase to afford compound **3** as a yellowish solid (25.5 mg, 36 %). <sup>1</sup>H NMR (400 MHz, CDCl<sub>3</sub>) δ 7.11 (d, J = 3.7 Hz, 2H), 6.69 (d, J = 3.7 Hz, 2H), 2.80 (t, J = 7.5 Hz, 4H), 2.57 (s, 6H), 1.72-1.64 (m, 4H), 1.42-1.25 (m, 20H), 0.90 (t, J = 6.9 Hz, 6H). <sup>13</sup>C NMR (101 MHz, CDCl<sub>3</sub>) δ 149.1, 144.6, 137.8, 135.8, 132.4, 124.4, 121.2, 120.1, 90.0, 85.3, 32.0, 31.7, 30.4, 29.4, 29.3, 29.2, 22.8, 14.5, 14.2. HRMS-APCI(m/z): [M + H<sup>+</sup>] calcd. for C<sub>36</sub>H<sub>45</sub>S<sub>4</sub>, 605.2399; found, 605.2399.

### 2.2.8. Synthesis of 2,5-bis((5-(2-ethylhexyl)thiophen-2-yl)ethynyl)-3,4-dimethylthieno[2,3-*b*]thiophene (4)

A mixture of compound **1d** (48.4 mg, 0.13 mmol), K<sub>2</sub>CO<sub>3</sub> (1.85 mg, 0.013 mmol) in MeOH (10 mL) was stirred at room temperature for 1.5 h. The mixture was extracted with CH<sub>2</sub>Cl<sub>2</sub> and the combined organic phase was washed with water and brine. The organic phase was dried over anhydrous MgSO<sub>4</sub>. Without extra purification, the solvent was removed in vacuo. The resulting brown solid, 2-(2-ethylhexyl)-5-iodothiophene (0.1 mL, 0.40 mmol),

$\text{Pd}(\text{PPh}_3)_4$  (7.75 mg, 5 mol%),  $\text{CuI}$  (2.55 mg, 10 mol%) in triethylamine (10 mL) were stirred at 55 °C for 20 h under  $\text{N}_2$  atmosphere.<sup>4, 5</sup> The mixture was extracted with  $\text{Et}_2\text{O}$  and the combined organic phase was washed with water and brine. The organic phase was dried over anhydrous  $\text{MgSO}_4$ . The solvent was removed in vacuo and the residue was purified by column chromatography on silica gel using hexane as the mobile phase to afford compound **4** as a brownish solid (33 mg, 40 %).  $^1\text{H}$  NMR (400 MHz,  $\text{CDCl}_3$ )  $\delta$  7.12 (d,  $J$  = 3.4 Hz, 2H), 6.68 (d,  $J$  = 3.7 Hz, 2H), 2.75 (d,  $J$  = 6.6 Hz, 4H), 2.57 (s, 6H), 1.64-1.55 (m, 4H), 1.4-1.31 (m, 14H), 0.93-0.88 (t, 12H).  $^{13}\text{C}$  NMR (101 MHz,  $\text{CDCl}_3$ )  $\delta$  147.7, 144.6, 137.8, 135.8, 132.3, 125.5, 121.3, 120.3, 90.0, 85.4, 41.6, 34.3, 32.5, 29.0, 25.6, 23.1, 14.5, 14.2, 10.9. HRMS-APCI( $m/z$ ):  $[\text{M} + \text{H}^+]$  calcd. for  $\text{C}_{36}\text{H}_{45}\text{S}_4$ , 605.2399; found, 605.2401.

**Table S1.**

Reported Thieno[2,3-*b*]thiophene Derivatives for Organic Field-Effect Transistors. ( $\mu$ : charge carrier mobility,  $I_{\text{on}}/I_{\text{off}}$ : current on/off ratio).

| No | Compound                                                                                                                                                              | $\mu_{\text{sat}}$<br>( $\text{cm}^2/\text{V}\cdot\text{s}$ ) | $I_{\text{on}}/I_{\text{off}}$ |
|----|-----------------------------------------------------------------------------------------------------------------------------------------------------------------------|---------------------------------------------------------------|--------------------------------|
| 1  | 1,4-bis(benzo[ <i>b</i> ]thieno[3,2- <i>d</i> ]thiophen-2-yl)benzene <sup>6</sup>                                                                                     | 0.46                                                          | $1.0 \times 10^7$              |
| 2  | 2,5-distyryl-dithieno[2,3- <i>b</i> :3',2'- <i>d</i> ]thiophene <sup>7</sup>                                                                                          | 2.0                                                           | $1.0 \times 10^5$              |
| 3  | 2,5-bis(phenylethynyl)thieno[2,3- <i>b</i> ]thiophene <sup>8</sup>                                                                                                    | 0.076                                                         | $1.0 \times 10^6$              |
| 4  | 2,5-distyryl-dithieno[2,3- <i>b</i> :2',3'- <i>d</i> ]thiophene <sup>9</sup>                                                                                          | 0.1                                                           | $1.0 \times 10^4$              |
| 5  | 2,5-bis(5-octylthiophen-2-yl)thieno[2,3- <i>b</i> ]thiophene <sup>10</sup>                                                                                            | 0.03                                                          | $1.0 \times 10^6$              |
| 6  | dinaphtho[2,3- <i>b</i> :2',3'- <i>e</i> ]thieno[2,3- <i>b</i> ]thiophene <sup>11</sup>                                                                               | $5.1 \times 10^{-5}$                                          | -                              |
| 7  | poly(2,5-bis(3-dodecylthiophen-2-yl)thieno[2,3- <i>b</i> ]thiophene) <sup>12</sup>                                                                                    | 0.15                                                          | $1.0 \times 10^5$              |
| 8  | poly(2,5-bis(2-octyldodecyl)-3-(5-(thieno[2,3- <i>b</i> ]thiophen-2-yl)thiophen-2-yl)-6-(thiophen-2-yl)pyrrolo[3,4- <i>c</i> ]pyrrole-1,4(2H,5H)-dione) <sup>13</sup> | 0.16                                                          | $1.0 \times 10^4$              |



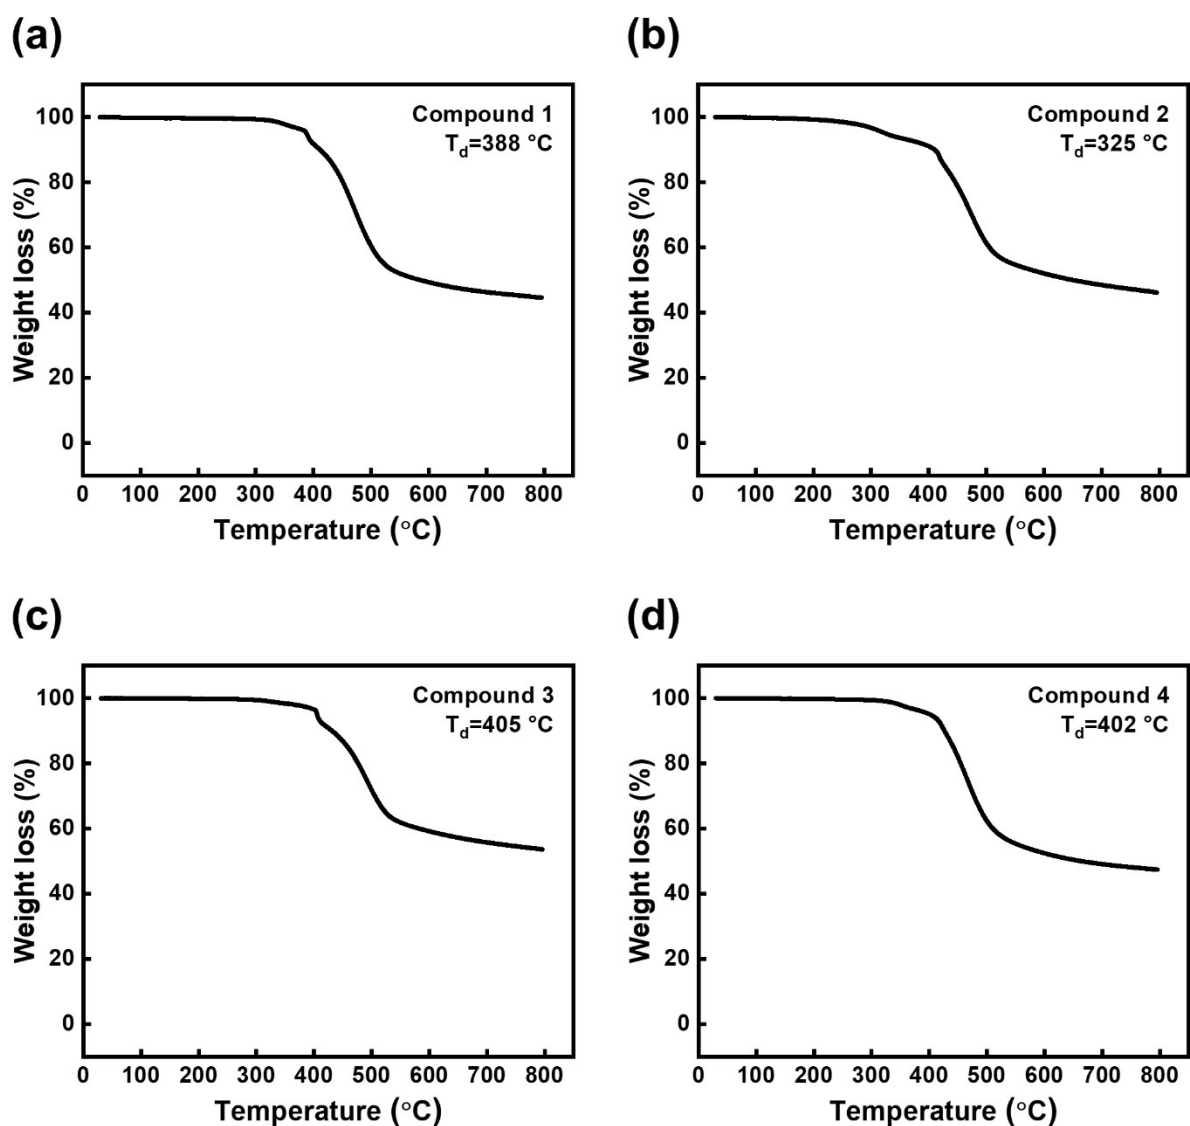

**Fig. S1.** Thermogravimetric analysis of TT-derivatives, (a) compound 1, (b) compound 2, (c) compound 3, and (d) compound 4 ( $T_d$ : 5 % weight loss temperature).

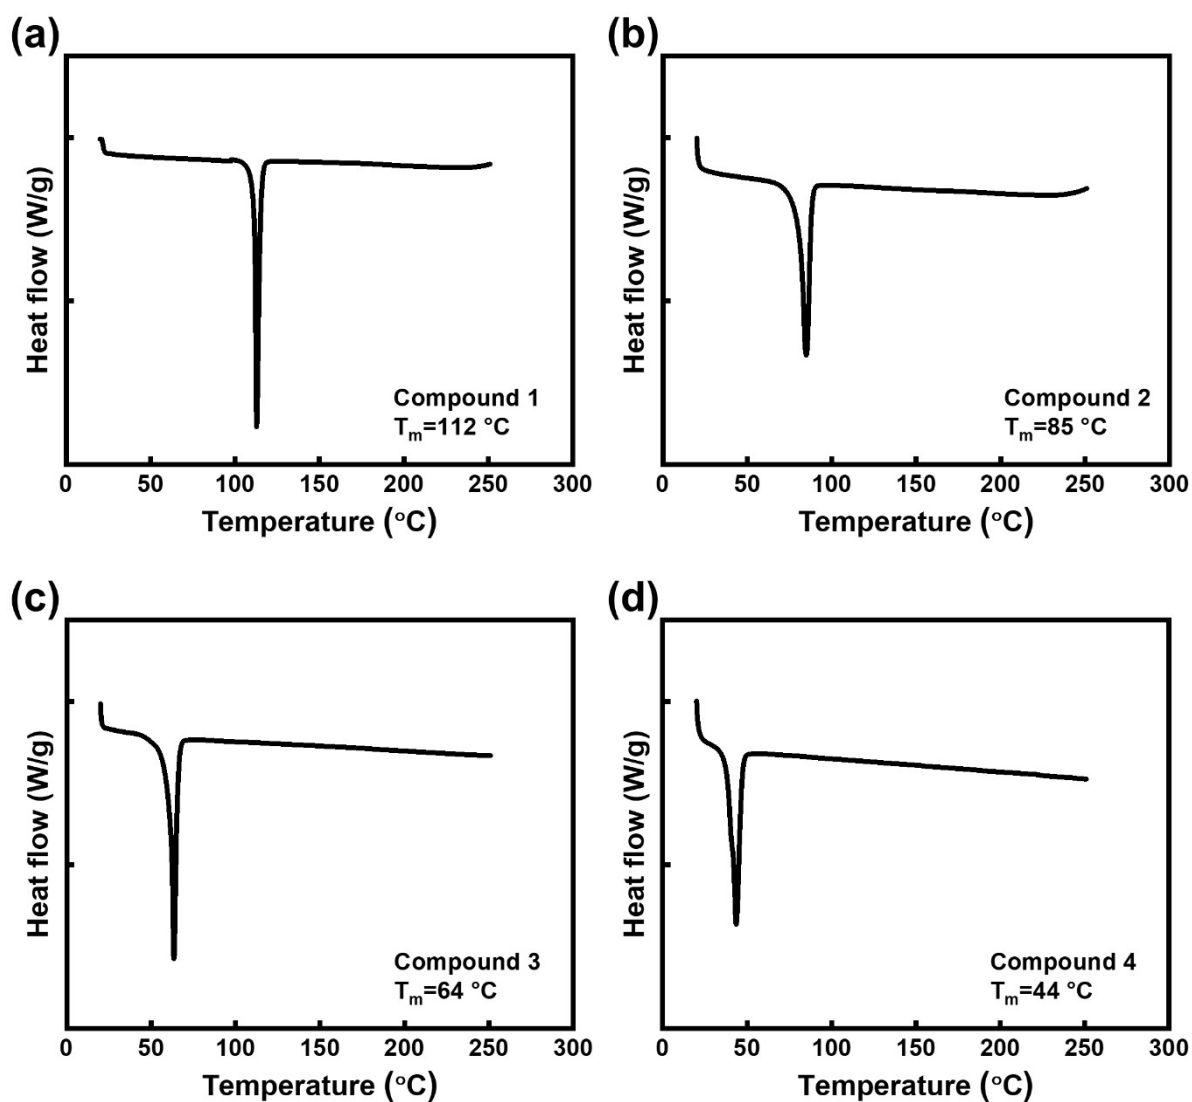

**Fig. S2.** Differential scanning calorimetry analysis of TT-derivatives, (a) compound 1, (b) compound 2, (c) compound 3, and (d) compound 4 ( $T_m$ : melting temperature).

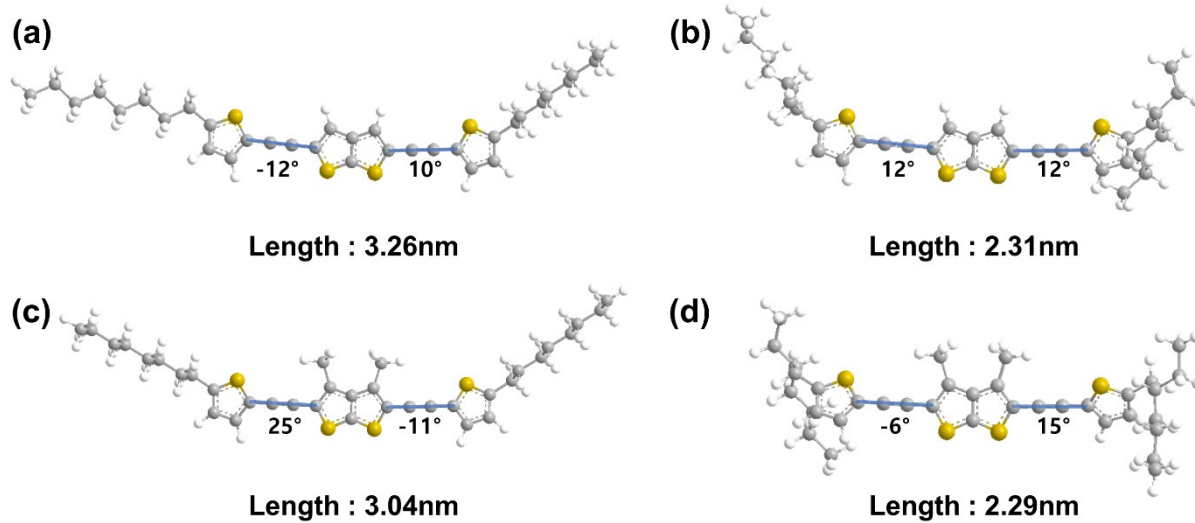

**Fig. S3.** Optimized structure of compounds (a) 1, (b) 2, (c) 3, and (d) 4 with dihedral angles.

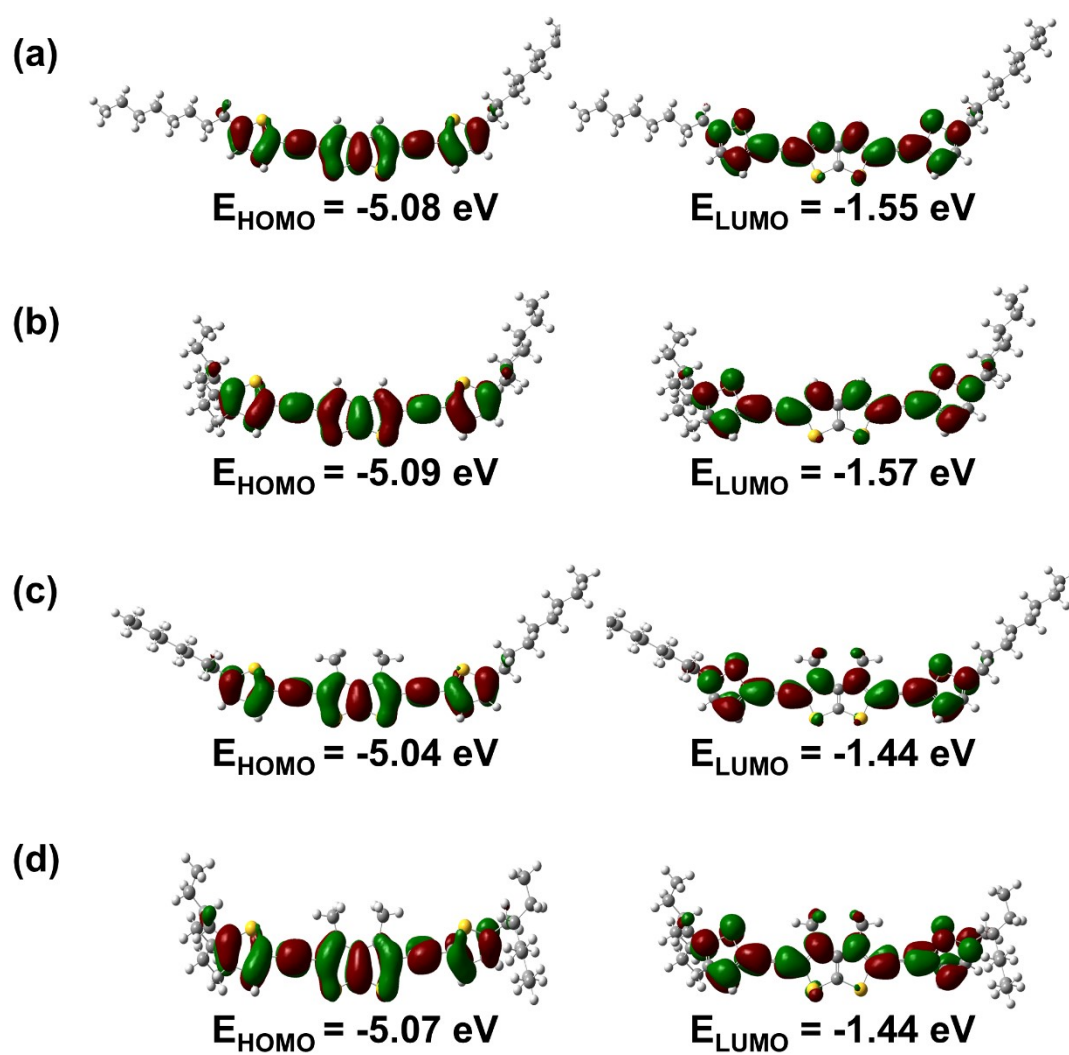

**Fig. S4.** Molecular orbital surfaces of compounds (a) 1, (b) 2, (c) 3, and (d) 4 by density functional theory calculations.

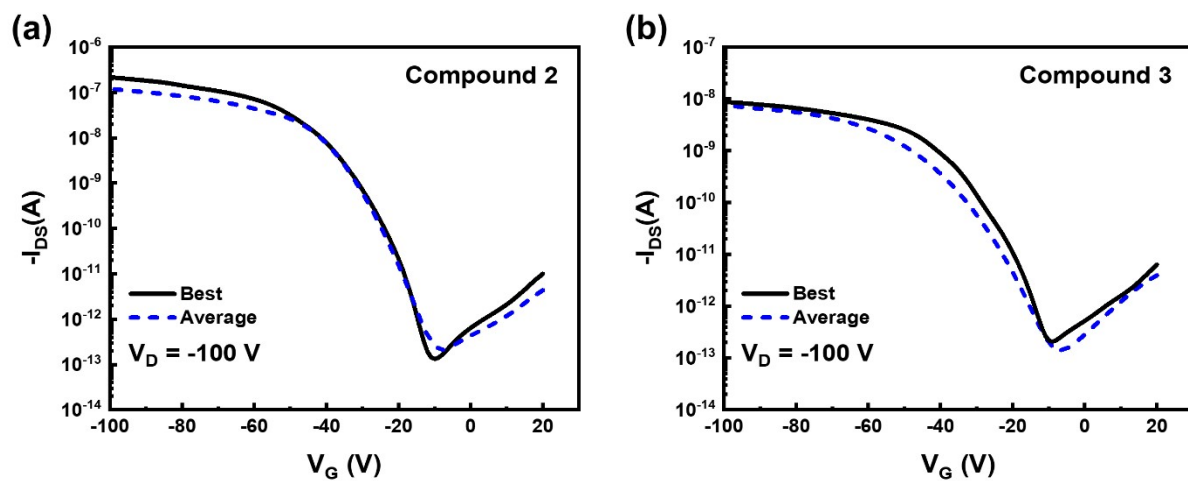

**Fig. S5.** Transfer characteristics of OFETs based on (a) compound 2 and (b) compound 3.

## Reference

1. M. Heeney, I. McCulloch and C. Bailey, Mono-, oligo- and polythieno(2,3-b)thiophenes and their use. *U.S. Patent No*, 2007, **7**, 183, 418.
2. V. Sharma, P. Srivastava, S. K. Bhardwaj and D. Agarwal, *Green Process. Synth.*, 2018, **7**, 477-486.
3. S. Otep, K. Ogita, N. Yomogita, K. Motai, Y. Wang, Y.-C. Tseng, C.-C. Chueh, Y. Hayamizu, H. Matsumoto and K. Ishikawa, *Macromolecules*, 2021, **54**, 4351-4362.
4. R. Chinchilla and C. Nájera, *Chem. Rev.*, 2007, **107**, 874-922.
5. A. Orsini, A. Vitérissi, A. Bodlenner, J.-M. Weibel and P. Pale, *Tetrahedron Lett.*, 2005, **46**, 2259-2262.
6. Y. Liu, Z. Liu, H. Luo, X. Xie, L. Ai, Z. Ge, G. Yu and Y. Liu, *J. Mater. Chem. C*, 2014, **2**, 8804-8810.
7. J. Shi, Y. Li, M. Jia, L. Xu and H. Wang, *J. Mater. Chem.*, 2011, **21**, 17612-17614.
8. S. Oh, H. Kang, M.-C. Chen, C. Kim and S. Seo, *Dyes Pigments*, 2025, **235**, 112603.
9. W. Yi, S. Zhao, H. Sun, Y. Kan, J. Shi, S. Wan, C. Li and H. Wang, *J. Mater. Chem. C*, 2015, **3**, 10856-10861.
10. J. Kim, H. Kang, C. Kim and S. Seo, *Mat. Sci. Semicon. Proc.*, 2025, **188**, 109250.
11. Y. Ogawa, E. Takiguchi, M. Mamada, D. Kumaki, S. Tokito and H. Katagiri, *Tetrahedron Lett.*, 2017, **58**, 963-967.
12. R. Rawcliffe, M. Shkunov, M. Heeney, S. Tierney, I. McCulloch and A. Campbell, *Chem. Commun.*, 2008, 871-873.
13. H.-S. Lee, J. S. Lee, A.-R. Jung, W. Cha, H. Kim, H. J. Son, J. H. Cho and B. Kim, *polymer*, 2016, **105**, 79-87.
